# Supplementary material for: Development of Populus alba L. and Populus tremula L. Species Specific Molecular Markers Based on the 5S rDNA Non-transcribed Spacer Polymorphism
Source: Preprints.org preprint supplement (doi:10.20944/preprints201911.0182.v1), 2019-11-15
Supplement: Supplementary file 1 [file supplementary]

|            |   |            |                |              |            |          |
|------------|---|------------|----------------|--------------|------------|----------|
|            |   | *          | 20             | *            |            |          |
| AJ843814.1 | : | -----      | CCCTTTTGCCCGT  | -----        | TCCCC      | : 18     |
| KU994872.1 | : | -----      | CCCTTTTGCCCGT  | -----        | TCCCC      | : 18     |
| KU994873.1 | : | -----      | CCCTTTTGCCCGT  | -----        | TCCCC      | : 18     |
| KU994874.1 | : | -----      | CCCTTTTGCCCGT  | -----        | TCCCC      | : 18     |
| AJ843771   | : | -----      | ACCCTTTTGCCCGT | -----        | TTCCC      | : 19     |
| AJ843772   | : | TTTTTTTTTG | CCTGTTT        | CTTATAAGGCT  | CCCCCTC    | -GC : 35 |
| KU994877   | : | TCTTTTTTTG | CCCGCTT        | CCCGTGCGGCTT | CCCCCTCCGC | : 37     |
| KU994878   | : | TCCTTTTTTA | CCCGATT        | CCCGAGCGGC   | CCCCCT--TC | : 33     |
| AJ843770   | : | TCCTTTTTTG | CCCGTTTT       | CCCGAGCGGC   | CCCCCT--GC | : 33     |
|            |   |            | CCc tTT Cccgt  |              | CCCC       |          |

|            |   |              |                  |                |          |             |
|------------|---|--------------|------------------|----------------|----------|-------------|
|            |   | 40           | *                | 60             | *        |             |
| AJ843814.1 | : | GTGCCTTCCTT  | ---              | CTTTTCTCCTTCTC | CCGC     | ---CAC : 49 |
| KU994872.1 | : | GTGCCTTCCTT  | ---              | CTTTTCTCCTTCTC | CCGC     | ---CAC : 49 |
| KU994873.1 | : | GTGCCTTCCTT  | ---              | CTTTTCTCCTTCTC | CCGC     | ---CAC : 49 |
| KU994874.1 | : | GTGCCTTCCTT  | ---              | CTTTTCTCCTTCTC | CCGC     | ---CAC : 49 |
| AJ843771   | : | GTATCCTCTT   | TG---            | TTTATCCTTCTC   | CCGC     | ---CGC : 50 |
| AJ843772   | : | GACCCC       | -CTTTTTCCTTTT    | CTCCTTCTC      | TTGC     | ---CCT : 68 |
| KU994877   | : | GACCCCTCT    | ATTCCCTTTT       | TCCT-CTC       | CTGC     | ---CCC : 70 |
| KU994878   | : | TTCCCCGCGCCG | -CACGCCTGCTGCTTG | CCGCATTCTC     |          | : 70        |
| AJ843770   | : | TTCCCCGCGCCG | -CACGCCTCCTGCTTG | CCGCATCCTC     |          | : 70        |
|            |   | gt cC Ct     |                  | c ttt TcCT CTc | ccGC C c |             |

|            |   |               |           |                   |             |       |
|------------|---|---------------|-----------|-------------------|-------------|-------|
|            |   | 80            | *         | 100               | *           |       |
| AJ843814.1 | : | CTTTTGGCCGTTT | C         | CCCGTGCTTCTT      | -----       | : 76  |
| KU994872.1 | : | CTTTTGGCCGTTT | C         | CCCG              | -----       | : 67  |
| KU994873.1 | : | CTTTTGGCCGTTT | C         | CCCGTGCTTCTT      | -----       | : 76  |
| KU994874.1 | : | CTTTTGGCCGTTT | C         | CCCGTGCTTCTT      | -----       | : 76  |
| AJ843771   | : | CT-TTT        | -CCTTTC   | CTGG-GAGGCTT      | CCCC-GCCTGC | : 82  |
| AJ843772   | : | CA-TTT        | -GCTTTC   | CC-ACGCGGCGTTTCTA | -CCTGC      | : 100 |
| KU994877   | : | CCCTTT        | -CCTTTC   | CCCGCTCAGCGT      | CCCTTGCCTGC | : 105 |
| KU994878   | : | TTCTTTT       | CATCCTTCT | CCCCCCCCCTTTTCCTT | -----       | : 102 |
| AJ843770   | : | TTCTTTT       | CATCCTTCT | CCCCCCCCCTTTTCCTT | -----       | : 102 |
|            |   | ct TTT        | C TTC     | Cccg c t          |             |       |

|            |   |                                        |   |       |   |       |
|------------|---|----------------------------------------|---|-------|---|-------|
|            |   | 120                                    | * | 140   | * |       |
| AJ843814.1 | : | -----                                  |   | ----- |   | : -   |
| KU994872.1 | : | -----                                  |   | ----- |   | : -   |
| KU994873.1 | : | -----                                  |   | ----- |   | : -   |
| KU994874.1 | : | -----                                  |   | ----- |   | : -   |
| AJ843771   | : | CGAGGATCGGGAAACGCGGTTTCTCTCGGGAGGAGTGA |   |       |   | : 120 |
| AJ843772   | : | CAAGGATAGAAGAACAAGGTTTCCCTTGAGAAGAGCGA |   |       |   | : 138 |
| KU994877   | : | CGAAGATAGAAGAATGAGGTTTCCCTCGAGAAGAGTGA |   |       |   | : 143 |
| KU994878   | : | -----                                  |   | ----- |   | : -   |
| AJ843770   | : | -----                                  |   | ----- |   | : -   |

|            | 160                       | * | 180       | *      |       |
|------------|---------------------------|---|-----------|--------|-------|
| AJ843814.1 | : -----                   |   | CCCCGGGGC | GAGGAC | : 91  |
| KU994872.1 | : -----                   |   | GGGC      | GAGGAC | : 77  |
| KU994873.1 | : -----                   |   | CCCCGGGGC | GAGGAC | : 91  |
| KU994874.1 | : -----                   |   |           |        | : -   |
| AJ843771   | : GGGAAGGTGCACCAAGCTCAGGG |   | CCCCGGGGT | GAGGAC | : 158 |
| AJ843772   | : TGGAAGGCACAGAAGACTCGGGG |   | CCTAGAGGC | GTGGAG | : 176 |
| KU994877   | : GGTAAGGCATAGAAGACTCAAGG |   | CCTCATAGT | TAGGAC | : 181 |
| KU994878   | : -----                   |   |           |        | : -   |
| AJ843770   | : -----                   |   |           |        | : -   |

|            | 200                     | * | 220                  |       |
|------------|-------------------------|---|----------------------|-------|
| AJ843814.1 | : TGCAATATCTAAAGATTC    |   | GGCGGTCGGCGTAGCGATTC | : 129 |
| KU994872.1 | : TGCAATATCTATAGATCC    |   | GGCGGTCGGCGTAGCGATTC | : 115 |
| KU994873.1 | : TGCAATATCTAAAGATCC    |   | GGCGGTCGGCGTAGCGATTC | : 129 |
| KU994874.1 | : -----                 |   |                      | : -   |
| AJ843771   | : TGCAAGATCTTTAGATCC    |   | GGTCGG               | : 182 |
| AJ843772   | : TGTAGGATCTAAAGATCC    |   | GGCGGTCGGAGTAGCGATTC | : 214 |
| KU994877   | : TGCAGGATCTAAAGATCTAGT |   | GGTCTGAGTAGCGATTC    | : 219 |
| KU994878   | : -----                 |   |                      | : -   |
| AJ843770   | : -----                 |   |                      | : -   |

|            | *                       | 240 | *                  | 260    |       |
|------------|-------------------------|-----|--------------------|--------|-------|
| AJ843814.1 | : CATGGCTACTATAAGGAAAAC |     | GGCCTCCGGAAGCTGTT  |        | : 167 |
| KU994872.1 | : CATGGCTGCTATAAGGAAAAC |     | GGCCTCCGGAAGCTGCT  |        | : 153 |
| KU994873.1 | : CATCGCTACTATAAGGAAAAC |     | GGCCTCCGGAAGCTGCT  |        | : 167 |
| KU994874.1 | : -----                 |     | CCCCGGG            | GCGA-- | : 87  |
| AJ843771   | : -----                 |     |                    |        | : -   |
| AJ843772   | : -ACAGCT-CTATAAGAAA--  |     | CGG-CTTTGAAAGCTCTT |        | : 247 |
| KU994877   | : GATGGCTGCTTCAAGAAAAAC |     | AGACTCCAAAAGCTTCT  |        | : 257 |
| KU994878   | : -----                 |     |                    |        | : -   |
| AJ843770   | : -----                 |     |                    |        | : -   |

|            | *                        | 280 | *                | 300 |       |
|------------|--------------------------|-----|------------------|-----|-------|
| AJ843814.1 | : GT                     |     |                  |     | : 169 |
| KU994872.1 | : GTAAAAATCTGGGCGCGATCCC |     | ACGGCCGGATCGCAGG |     | : 191 |
| KU994873.1 | : GTAAAAATCTGGGCGCGATCCA |     | ACGGCCGGATCGCAGG |     | : 205 |
| KU994874.1 | : -----                  |     |                  |     | : -   |
| AJ843771   | : -----                  |     |                  |     | : -   |
| AJ843772   | : GTAATGGTCTGAGCATGATCCA |     | ACAGCCGGATCGCAAG |     | : 285 |
| KU994877   | : GTAAAAGTCTGAGCGCGATCCA |     | ACTGCCGGATCGTAGG |     | : 295 |
| KU994878   | : -----                  |     |                  |     | : -   |
| AJ843770   | : -----                  |     |                  |     | : -   |

|            |   |               |                           |       |     |     |
|------------|---|---------------|---------------------------|-------|-----|-----|
|            |   | *             | 320                       | *     | 340 |     |
| AJ843814.1 | : | -----         |                           | ----- |     | -   |
| KU994872.1 | : | TTATGGCCCTTT  | -----                     | ----- |     | 203 |
| KU994873.1 | : | TTATGGCCCTTT  | -----                     | ----- |     | 217 |
| KU994874.1 | : | -----         |                           | ----- |     | -   |
| AJ843771   | : | -----         |                           | ----- |     | -   |
| AJ843772   | : | TTACAGGCCTTTT | GAGCCGCTGTTATGGTCCGACGCAA |       |     | 323 |
| KU994877   | : | TTACAGGCCTTTT | GAGCCGTCGTTTTGGTTCAATGCGA |       |     | 333 |
| KU994878   | : | -----         |                           | ----- |     | -   |
| AJ843770   | : | -----         |                           | ----- |     | -   |

|            |   |                |                            |       |              |     |
|------------|---|----------------|----------------------------|-------|--------------|-----|
|            |   | *              | 360                        | *     | 380          |     |
| AJ843814.1 | : | -----          |                            | ----- |              | -   |
| KU994872.1 | : | -----          |                            | ----- | CGGG         | 207 |
| KU994873.1 | : | -----          |                            | ----- | CGGG         | 221 |
| KU994874.1 | : | -----          |                            | ----- |              | -   |
| AJ843771   | : | -----          |                            | ----- | GCTTCCCCCTAG | 193 |
| AJ843772   | : | ACCGGCCTGCTCCG | GGGGCCCTAGTCACGCTTCCCCCGGG |       |              | 361 |
| KU994877   | : | ACCGACCTGCTCCG | GGGGCCCCGTTGTGCTTCCCCCAGG  |       |              | 371 |
| KU994878   | : | -----          |                            | ----- |              | -   |
| AJ843770   | : | -----          |                            | ----- |              | -   |

|            |   |                |                             |       |   |     |
|------------|---|----------------|-----------------------------|-------|---|-----|
|            |   | *              | 400                         | *     | 4 |     |
| AJ843814.1 | : | -----          |                             | ----- |   | -   |
| KU994872.1 | : | CCGCCGT-TC     | ---GCTGCGGGGCCCGGTCGGGCTTCC |       |   | 240 |
| KU994873.1 | : | CCGCCGT-TC     | ---GCTGCGGGGCCCGGTCGGGCTTCC |       |   | 254 |
| KU994874.1 | : | -----          |                             | ----- |   | -   |
| AJ843771   | : | CCGCCTCCCCTCGT | GCAGCGGAGC---TT-GAGCCGCA    |       |   | 227 |
| AJ843772   | : | CCGCCACCTCTT   | -TGCGGCAGTGC---GT-GAACCACC  |       |   | 394 |
| KU994877   | : | CCGCTGCCTCTT   | -TGCGGCGGTGC---GT-GAACCACC  |       |   | 404 |
| KU994878   | : | -----          |                             | ----- |   | -   |
| AJ843770   | : | -----          |                             | ----- |   | -   |

|            |   |                                        |                     |     |   |     |
|------------|---|----------------------------------------|---------------------|-----|---|-----|
|            |   | 20                                     | *                   | 440 | * |     |
| AJ843814.1 | : | -----CGCGTGGCAGC-CTCC-CACTAGG-GC--C-   |                     |     |   | 194 |
| KU994872.1 | : | CCG-AGCCGCGTGGCAGC-CTCC-CGCTGGG-GC--C- |                     |     |   | 271 |
| KU994873.1 | : | CCG-AGCCTCGTGGCAGC-CTCC-CGCTGGG-GC--C- |                     |     |   | 285 |
| KU994874.1 | : | -----TCATACCAGCACTCATC-CTAGT-ACTACT    |                     |     |   | 115 |
| AJ843771   | : | TGGCAGCCACCCGTG-GCTCTCCCCGCGGGT-GC--C- |                     |     |   | 260 |
| AJ843772   | : | TAGTAGCCTCACTTC-GCTCTACCCGAGGC-TT--C-  |                     |     |   | 427 |
| KU994877   | : | TGGCAGCCTCCCGTT-GCTCTCCTCGTAGGT-AC--C- |                     |     |   | 437 |
| KU994878   | : | -----TCCCGGGAGACTTCCCGCCTGCCGAGGAT     |                     |     |   | 132 |
| AJ843770   | : | -----TCCCGGG-----                      |                     |     |   | 109 |
|            |   |                                        | C g gc ctcc c c g c |     |   |     |

|            | 460             | *      | 480                | *              |       |
|------------|-----------------|--------|--------------------|----------------|-------|
| AJ843814.1 | : CTCGAACCGCT   | -TATAG | CAATTGCGCGT        | GTCATCCAGTC    | : 231 |
| KU994872.1 | : CTCGAACCGCT   | -TATAG | CAATTGCGT          | GTCATCGAGTC    | : 308 |
| KU994873.1 | : CTCGAACCGCT   | -TATAG | CAATTGCGCGT        | GTCATCGAGTC    | : 322 |
| KU994874.1 | : CTCGAACCGCT   | -TATAG | CAATTGCGCGT        | GTCATCGAGTC    | : 152 |
| AJ843771   | : CTCGAAGCGCT   | -TATAG | CAATTGTGCGT        | GTCATCGACTC    | : 297 |
| AJ843772   | : TTTGAAGAGCA   | -TATAG | CAATTGTGT          | GTCATGGACTC    | : 464 |
| KU994877   | : TTCGAAGCGGT   | -TATAA | CAATTGCGCGT        | GCTTGGACTC     | : 474 |
| KU994878   | : CGGAGAACGCGGT | TTCC   | CGCCTGC            | -CGAGGATCGACTC | : 169 |
| AJ843770   | : -----         | CGAT   | TGCGCGT            | GTCATCGATTC    | : 130 |
|            | t aa cgc        | tata   | CaatTGcgcGtGcaTcgA | TC             |       |

|            |       |       |
|------------|-------|-------|
| AJ843814.1 | : TC- | : 233 |
| KU994872.1 | : T-- | : 309 |
| KU994873.1 | : T-- | : 323 |
| KU994874.1 | : T-- | : 153 |
| AJ843771   | : AT- | : 299 |
| AJ843772   | : AC- | : 466 |
| KU994877   | : ATA | : 477 |
| KU994878   | : A-- | : 170 |
| AJ843770   | : AC- | : 132 |
