# Supplementary material for: Development of Populus alba L. and Populus tremula L. Species Specific Molecular Markers Based on the 5S rDNA Non-transcribed Spacer Polymorphism
Source: Preprints.org preprint supplement (doi:10.20944/preprints201911.0182.v1), 2019-11-15
Supplement: Supplementary file 2 [file supplementary]

|          |   |         |         |          |           |         |           |        |           |             |                |
|----------|---|---------|---------|----------|-----------|---------|-----------|--------|-----------|-------------|----------------|
|          |   |         | *       |          | 20        |         | *         |        | 40        |             |                |
| AJ843771 | : | -----   | AC      | CCCT     | TTTG      | CCCGT   | -----     | TTCCC  | -----     | GT          | : 21           |
| AJ843772 | : | TTTTTTT | TG      | CC       | TG        | TTT     | -         | CTTATA | AGGCT     | CCC         | TC-GCGA : 37   |
| KU994877 | : | TCTTTT  | TG      | CC       | CT        | TTT     | -         | CCCGT  | GCGGCT    | TTCCC       | TCCGGA : 39    |
| KU994872 | : | -----   | CC      | CT       | TTTG      | CCCGT   | -----     | TTCCC  | -----     | GT          | : 20           |
|          |   |         |         | CCc      | TTT       | CccgT   |           | ttCCCc |           | G           |                |
|          |   |         |         |          |           |         |           |        |           |             |                |
|          |   |         | *       |          | 60        |         | *         |        | 80        |             |                |
| AJ843771 | : | AT      | CCT     | CTTT     | G---      | TTT     | ATCCTT    | CTCCC  | GCCG      | CCT         | TTT-- : 55     |
| AJ843772 | : | CCCC    | -       | CTTT     | TTCC      | TTTT    | TTCC      | TTCT   | CTTG      | CCCT        | CA-TTT-- : 73  |
| KU994877 | : | CCCCT   | CT      | ATT      | CCCT      | TTTT    | TTCC      | TTCT   | CTTG      | CCCC        | CCCTTT-- : 76  |
| KU994872 | : | GCCT    | TCTT    | ---      | CT        | TTTT    | CTCCT     | TTCCC  | GCC       | ACCT        | TTTTGC : 57    |
|          |   |         |         | cCctCTtt | c         | TTT     | TCCTtCTCc | GCC    | cC        | TTT         |                |
|          |   |         |         |          |           |         |           |        |           |             |                |
|          |   |         | *       |          | 100       |         | *         |        | 120       |             |                |
| AJ843771 | : | CCT     | TTCC    | TG       | G-        | GAGGCT  | TTCCC     | -      | GCCTGCC   | GAGGAT      | CGGG : 93      |
| AJ843772 | : | GCT     | TTCCC   | -        | ACGCGGCGT | TTCTA   | -         | CCTGCC | AAGGAT    | AGAA        | : 111          |
| KU994877 | : | CCT     | TTCCCC  | CGCTC    | AGCGTCCC  | TTG     | CCTGCC    | GAAGAT | AGAA      |             | : 116          |
| KU994872 | : | CCG     | TTCCCC  | G        | -----     |         |           |        |           |             | : 67           |
|          |   |         |         | cCtTTCCc | g         | gc      | t c       | cctgcc | a         | gat         | g              |
|          |   |         |         |          |           |         |           |        |           |             |                |
|          |   |         | *       |          | 140       |         | *         |        | 160       |             |                |
| AJ843771 | : | AAACG   | CGGTTT  | CT       | CTCGG     | GAGG    | AGAGT     | GAGG   | GAAGG     | TGCA        | ACC : 133      |
| AJ843772 | : | GAACA   | AGGTTT  | CC       | CTTG      | AGA     | AGAGC     | GATG   | GAAGG     | CAC         | AGA : 151      |
| KU994877 | : | GAAT    | GAGGTTT | CC       | CTCG      | AGA     | AGAGT     | GAGG   | TAAGG     | CAT         | AGA : 156      |
| KU994872 | : | -----   |         |          |           |         |           |        |           |             | : -            |
|          |   |         |         | aa       | ggtttc    | ct      | g         | ga     | gag       | ga          | g aagg a       |
|          |   |         |         |          |           |         |           |        |           |             |                |
|          |   |         | *       |          | 180       |         | *         |        | 200       |             |                |
| AJ843771 | : | AAGCT   | CAGGG   | CCCGGGT  | GAGG      | ACTG    | CAAGAT    | CTTT   | AGA       |             | : 173          |
| AJ843772 | : | AGACT   | CGGG    | CCTAG    | AGGCGT    | GAGT    | GATG      | AGGAT  | CTAA      | AGA : 191   |                |
| KU994877 | : | AGACT   | CAAGG   | CCTCAT   | AGTTAGG   | ACTG    | CAGGAT    | CTAA   | AGA : 196 |             |                |
| KU994872 | : | -----   |         |          | GGGCG     | AGGACTG | CAATAT    | CTAT   | AGA : 92  |             |                |
|          |   |         |         | a        | ctc       | ggcc    | gG        | gaGGA  | cTGcA     | gATCTa      | AGA            |
|          |   |         |         |          |           |         |           |        |           |             |                |
|          |   |         | *       |          | 220       |         | *         |        | 240       |             |                |
| AJ843771 | : | TCC     | ---     | GGT      | CGG       | -----   |           |        |           |             | : 182          |
| AJ843772 | : | TCCGG   | CGGTC   | GGAG     | TAGCG     | ATT     | -         | ACAGCT | -         | CTATA       | AAGAA : 229    |
| KU994877 | : | TCTAG   | TGGT    | CTG      | AGTAG     | CGATT   | CGATG     | GCTG   | CTCA      | AAGAA : 236 |                |
| KU994872 | : | TCCGG   | CGGTC   | GGC      | GTAG      | CGATT   | CCATG     | GCTG   | CTATA     | AAGAA : 132 |                |
|          |   |         |         | TCc      | g         | GGTCgG  | gtagc     | gattc  | a         | gct         | ct aag a       |
|          |   |         |         |          |           |         |           |        |           |             |                |
|          |   |         | *       |          | 260       |         | *         |        | 280       |             |                |
| AJ843771 | : | -----   |         |          |           |         |           |        |           |             | : -            |
| AJ843772 | : | A--     | CGG     | -        | CTTT      | GAAAG   | CTT       | TGTA   | ATGGT     | CTG         | AGCATGAT : 266 |
| KU994877 | : | AAAC    | AGACT   | CCAA     | AAGCT     | TCT     | TGTA      | AAAGT  | CTG       | AGCG        | CATGAT : 276   |
| KU994872 | : | AAAC    | GGC     | CTCC     | GGAAG     | CTG     | TGTA      | AAAA   | TCTG      | GGCG        | CATGAT : 172   |
|          |   |         |         | a        | c         | g       | ct        | aagct  | tgtaa     | tctg        | gc gat         |

```

          *           300           *           320
AJ843771 : ----- : -
AJ843772 : CCAACAGCCGGATCGCAAGTTACAGGCCTTTTGAGCCGCT : 306
KU994877 : CCAACTGCCGGATCGTAGTTACAGGCCTTTTGAGCCGCTC : 316
KU994872 : CCCACGGCCGGATCGCAGGTTATGGCCCTTT----- : 203
          cc ac gccg gatcg a gtta g ccttt

```

```

          *           340           *           360
AJ843771 : ----- : -
AJ843772 : GTTATGGTCCGACGCAAACCGGCCTGCTCCGGGGCCCTAG : 346
KU994877 : GTTTTGGTTCAATGCGAACCGACCTGCTCCGGGGCCCGG : 356
KU994872 : ----- : -

```

```

          *           380           *           400
AJ843771 : ----GCTTCCCCTAGCCGCCTCCCCTCGTGCAAGCGGAGC- : 217
AJ843772 : TCACGCTTCCCCTGGGCCGCCACCTCTT-TGCGGCAGTGC- : 384
KU994877 : TTGTGCTTCCCCTAGGCCGCTGCCTCTT-TGCGGCAGTGC- : 394
KU994872 : ----CGGGCCGCCGT-TC----GCTGCGGGGCC : 227
          gcttcccC gGCCGCc cctCt tGC GCgG GC

```

```

          *           420           *           440
AJ843771 : --TT-GAGCCGCATGGCAGCCACCCGTGGCT-CTCCCGGC : 253
AJ843772 : --GT-GAACCACCTAGTAGCCTCACTTTCGCT-CTACCCGC : 420
KU994877 : --GT-GAACCACCTGGCAGCCTCCCGTTGCT-CTCCTCGT : 430
KU994872 : CGGTGCGGCTTCCCG-AGCCGC--GTGGCAGCCTCCCGC : 264
          gT Ga Cc Cct G AGCC C cgT Gct Ct CcCGc

```

```

          *           460           *           480
AJ843771 : GGGTGCCCTCGAAGCGCTTATAGCAATTGTGCCTGCATCG : 293
AJ843772 : AGGCTTCTTTGAAGAGCATATAGCAATTGTGTGTGCATGG : 460
KU994877 : AGGTACCTTCGAAGCGGTTATAACAATTGCGCGTGCTTGG : 470
KU994872 : TGGGGCCCTCGAACCGCTTATAGCAATTGCGTGTGCATCG : 304
          GG cC TcGAAGcGctTATAgCAATTG G GTGCat G

```

```

AJ843771 : ACTCAT- : 299
AJ843772 : ACTCAC- : 466
KU994877 : ACTCATA : 477
KU994872 : AGTCT-- : 309
          AcTCa

```
