# Supplementary material for: Development of Populus alba L. and Populus tremula L. Species Specific Molecular Markers Based on the 5S rDNA Non-transcribed Spacer Polymorphism
Source: Preprints.org preprint supplement (doi:10.20944/preprints201911.0182.v1), 2019-11-15
Supplement: Supplementary file 3 [file supplementary]

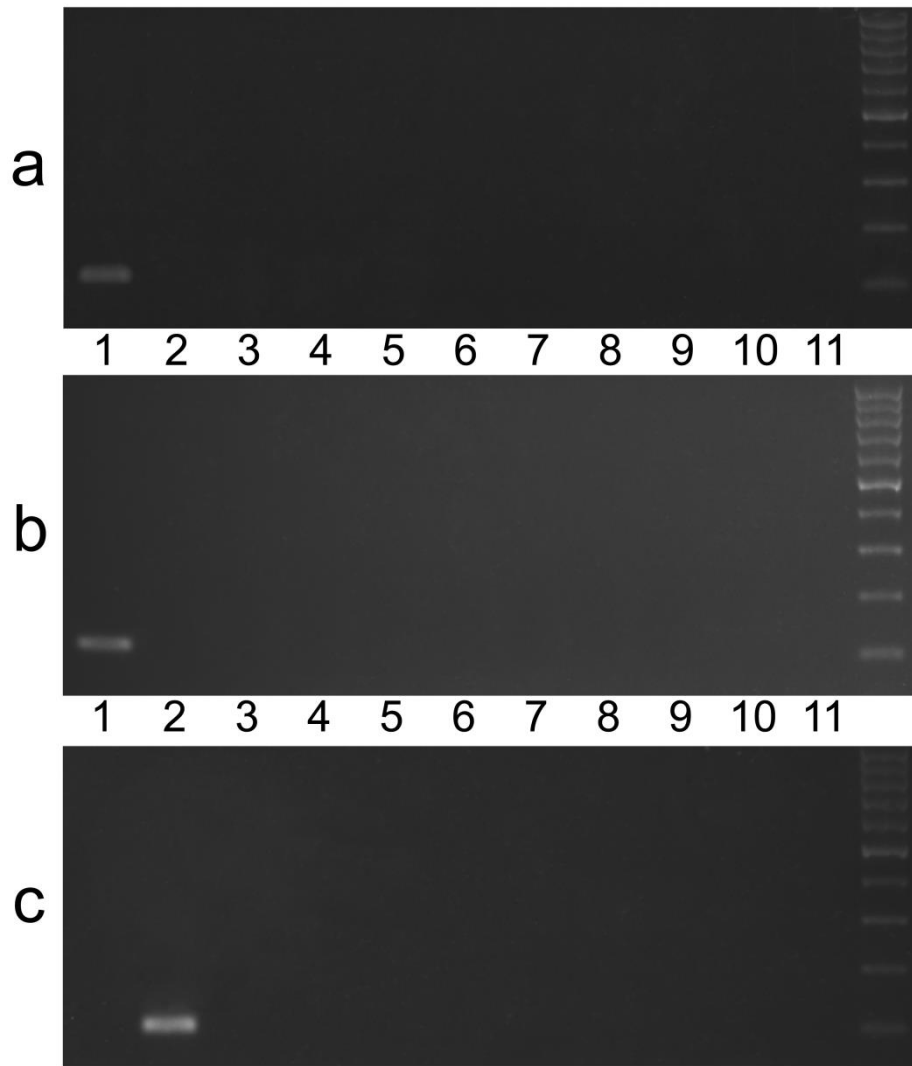

**Figure S8.** The results of the second stage of the PCR test: (a) with the *alb2* marker; (b) with the *alb9* marker; (c) with the *tremu1* marker. The numbers in all panels correspond to the following samples: 1—*P. alba* L. tree#1; 2—*P. tremula* L. tree#12; 3—*P. nigra* L. tree#19; 4—*P. deltoides* Bartr. ex Marshall tree#20; 5—*P. × canadensis* Moench. tree#21; 6—*P. trichocarpa* Torr. et A. Gray tree#22; 7—*P. maximowiczii* Henry tree#23; 8—*P. simonii* Can. tree#24; 9—*P. candicans* Ait. tree#25; 10—*P. × moskoviensis* R. I. Schrod. tree#26; 11—*P. × berlinensis* K. Koch. tree#27.
