# Supplementary material for: Development of Populus alba L. and Populus tremula L. Species Specific Molecular Markers Based on the 5S rDNA Non-transcribed Spacer Polymorphism
Source: Preprints.org preprint supplement (doi:10.20944/preprints201911.0182.v1), 2019-11-15
Supplement: Supplementary file 4 [file supplementary]

|          |   |                                                   |   |     |  |
|----------|---|---------------------------------------------------|---|-----|--|
|          |   | *                      20                      *  |   | 40  |  |
| KU994872 | : | CCCTTTTGCCCGTTCCCCGTCCTTCTTCTTTTCTCCTTC           | : | 40  |  |
| KU994873 | : | CCCTTTTGCCCGTTCCCCGTCCTTCTTCTTTTCTCCTTC           | : | 40  |  |
|          |   | CCCTTTTGCCCGTTCCCCGTCCTTCTTCTTTTCTCCTTC           |   |     |  |
|          |   | *                      60                      *  |   | 80  |  |
| KU994872 | : | TCCCGCCACCTTTTTTGCCCGTTCCCCG-----                 | : | 67  |  |
| KU994873 | : | TCCCGCCACCTTTTTTGCCCGTTCCCCGTGCCTTCTTCCCC         | : | 80  |  |
|          |   | TCCCGCCACCTTTTTTGCCCGTTCCCCG                      |   |     |  |
|          |   | *                      100                      * |   | 120 |  |
| KU994872 | : | -GGGCGAGGACTGCAATATCTATAGATCCGGCGGTCGGCG          | : | 106 |  |
| KU994873 | : | GGGCGAGGACTGCAATATCTAAAGATCCGGCGGTCGGCG           | : | 120 |  |
|          |   | GGGCGAGGACTGCAATATCTA AGATCCGGCGGTCGGCG           |   |     |  |
|          |   | *                      140                      * |   | 160 |  |
| KU994872 | : | TAGCGATTCCATGGCTGCTATAAGGAAAACGGCCTCCGGA          | : | 146 |  |
| KU994873 | : | TAGCGATTCCATCGCTACTATAAGGAAAACGGCCTCCGGA          | : | 160 |  |
|          |   | TAGCGATTCCAT GCT CTATAAGGAAAACGGCCTCCGGA          |   |     |  |
|          |   | *                      180                      * |   | 200 |  |
| KU994872 | : | AGCTGCTGTAAAAATCTGGGCGCGATCCACGGCCGGATC           | : | 186 |  |
| KU994873 | : | AGCTGCTGTAAAAATCTGGGCGCGATCCACGGCCGGATC           | : | 200 |  |
|          |   | AGCTGCTGTAAAAATCTGGGCGCGATCC ACGGCCGGATC          |   |     |  |
|          |   | *                      220                      * |   | 240 |  |
| KU994872 | : | GCAGGTTATGGCCCTTTCGGGCCGCCGTTTCGCTGCGGGGC         | : | 226 |  |
| KU994873 | : | GCAGGTTATGGCCCTTTCGGGCCGCCGTTTCGCTGCGGGGC         | : | 240 |  |
|          |   | GCAGGTTATGGCCCTTTCGGGCCGCCGTTTCGCTGCGGGGC         |   |     |  |
|          |   | *                      260                      * |   | 280 |  |
| KU994872 | : | CCGGTCGGGCTTCCCCGAGCCGCGTGGCAGCCTCCCGCTG          | : | 266 |  |
| KU994873 | : | CCGGTCGGGCTTCCCCGAGCCTCGTGGCAGCCTCCCGCTG          | : | 280 |  |
|          |   | CCGGTCGGGCTTCCCCGAGCC CGTGGCAGCCTCCCGCTG          |   |     |  |
|          |   | *                      300                      * |   | 320 |  |
| KU994872 | : | GGGCCCTC GAACCGCTTATAGCAATTGCGTGTGCATCGAG         | : | 306 |  |
| KU994873 | : | GGGCCCTC GAACCGCTTATAGCAATTGCGGTGTGCATCGAG        | : | 320 |  |
|          |   | GGGCCCTC AACCGCTTATAGCAATTGCG GTGCATCGAG          |   |     |  |
| KU994872 | : | TCT                                               | : | 309 |  |
| KU994873 | : | TCT                                               | : | 323 |  |
|          |   | TCT                                               |   |     |  |
